# Supplementary material
Source: publisher figshare collection journal article supplement (https://acs.figshare.com/ndownloader/files/4555480)
Supplement: Supplementary file 1 [file 4555480]

# Simultaneous Growth of Pure Hyperbranched $\text{Zn}_3\text{As}_2$ Structures and Long $\text{Ga}_2\text{O}_3$ Nanowires

Jianye Li, Lung-Shen Wang, D. Bruce Buchholz and Robert P.H. Chang

*Department of Materials Science & Engineering and*

*Materials Research Center, Northwestern University, Evanston, Illinois 60208*

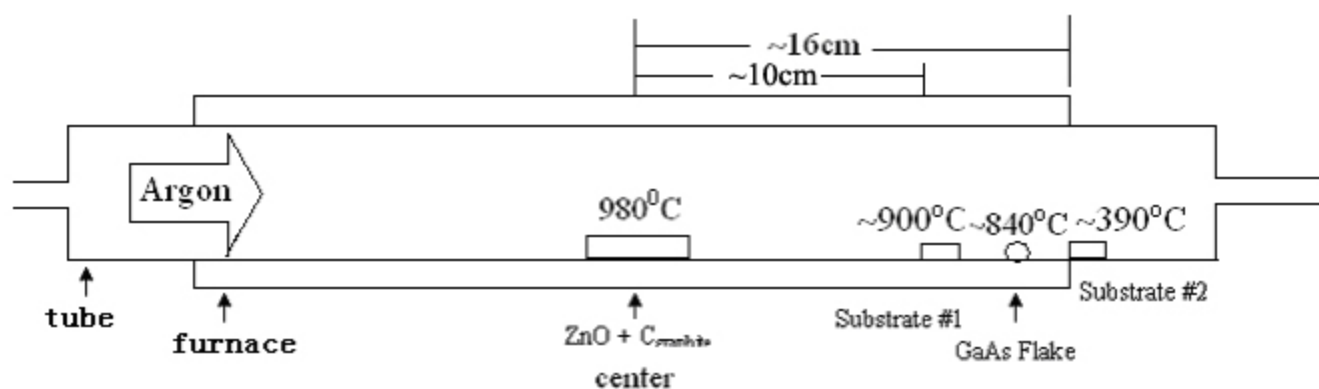

**Figure S1.** Schematic of the growth system for the  $\text{Zn}_3\text{As}_2$  structures and  $\text{Ga}_2\text{O}_3$  nanowires.

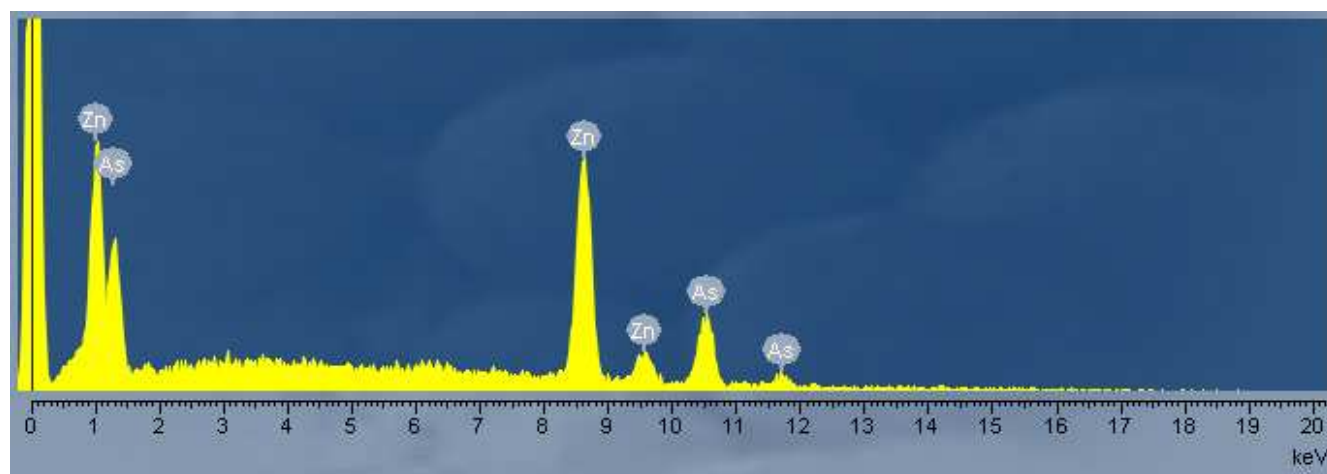

**Figure S2** EDX spectrum of a hyperdendritic  $\text{Zn}_3\text{As}_2$  structures.

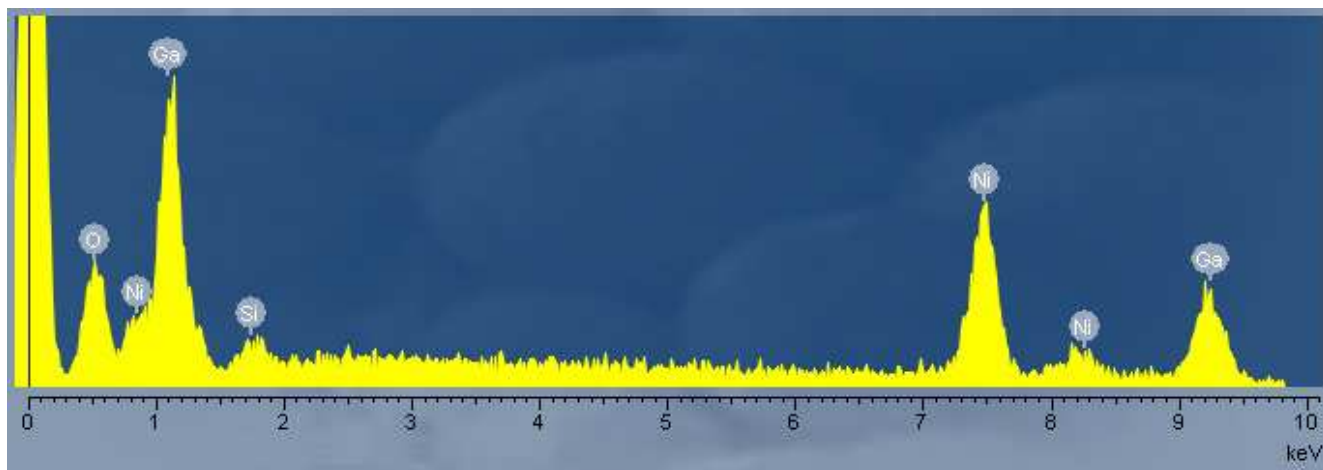

**Figure S3** EDX spectrum taken from a catalyst tip at a Ga<sub>2</sub>O<sub>3</sub> nanowire end.

### Device fabrication and measurement:

The devices for electrical measurement were fabricated by an e-beam lithographic technique and the procedure is described as follows. First, suspensions of the as-grown nanowires were formed in isopropanol by ultrasonic agitation. The suspensions were dispersed on n-type silicon wafers with a 1  $\mu$ m-thick thermal oxide (Silicon Quest) that had been pretreated with hot piranha solution, a mixture of 1 part concentrated hydrogen peroxide and 2 parts concentrated H<sub>2</sub>SO<sub>4</sub>. Polymethylmethacrylate (PMMA) resist layers were spin-coated on the nanowires- dispersed wafers, and contact patterns were defined on the resist layers by electron irradiation carried out in a SEM (FEI Quanta 600F). The patterns were developed with a mixture of 1:3 methyl isobutyl ketone (MIBK)/isopropanol. After development, Ti/Au metal films were evaporated on the resist and final pattern formation was accomplished by lift-off in C<sub>2</sub>H<sub>2</sub>Cl<sub>2</sub>/acetone. The devices were imaged before electrical measurement to ensure that only one nanowire was between two metal contacts. Electrical transport measurements were performed at room temperature on a home-built probe station. The probe station consisted of a Bausch & Lomb MicroZoom II microscope, Rucker & Kolls Model 222 XYZ manipulators with 25  $\mu$ m probe tips, and a Keithley 273 source-meter controlled by an Agilent VEE Pro program through the IEEE 488 bus.

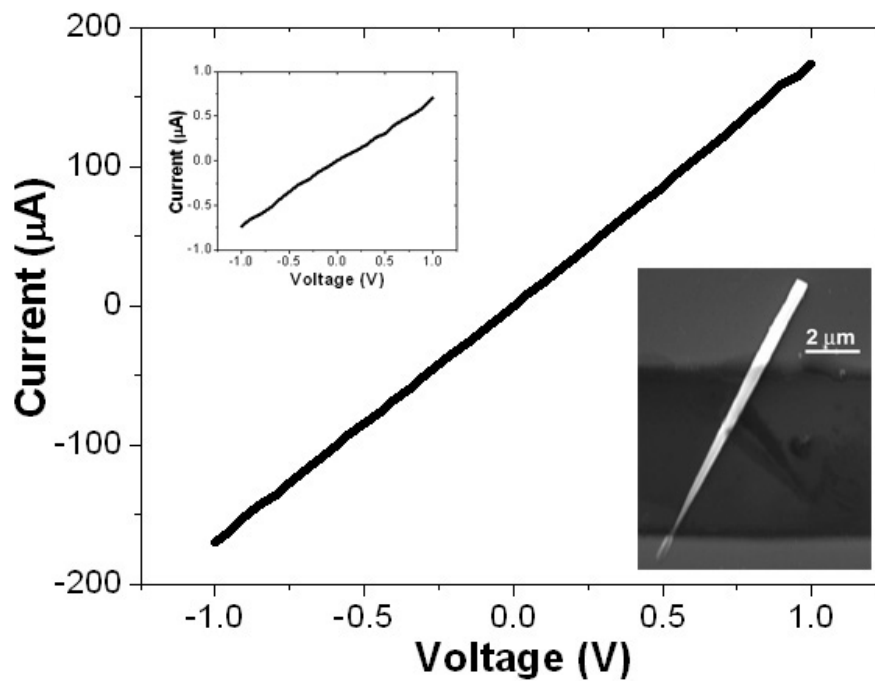

**Figure S4.** Room temperature transport measurements on an individual cone-shaped  $\text{Zn}_3\text{As}_2$  nanowire device and the curve displays a linear  $I$ - $V$  behavior. (Inset right) FESEM image of the  $\text{Zn}_3\text{As}_2$  nanowire device. (Inset left) room temperature  $I$ - $V$  behavior of an individual  $\text{ZnO}$  nanowire device; the  $\text{ZnO}$  nanowire's diameter is 170 nm and the nanowire's length between two metal contacts is 7  $\mu\text{m}$ .

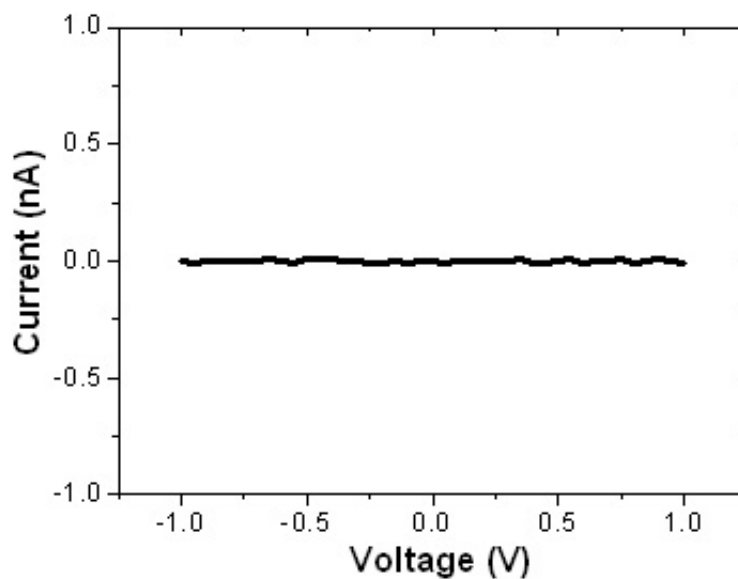

**Figure S5.** Room temperature transport properties of an individual  $\beta\text{-Ga}_2\text{O}_3$  nanowire device.
